# Supplementary material
Source: PubMed Central journal article supplement (PMC2590745)
Supplement: tpc.107.056796_1.pdf [file tpc.107.056796_1.pdf]

**SUPPLEMENTAL FIGURE 1 ONLINE**

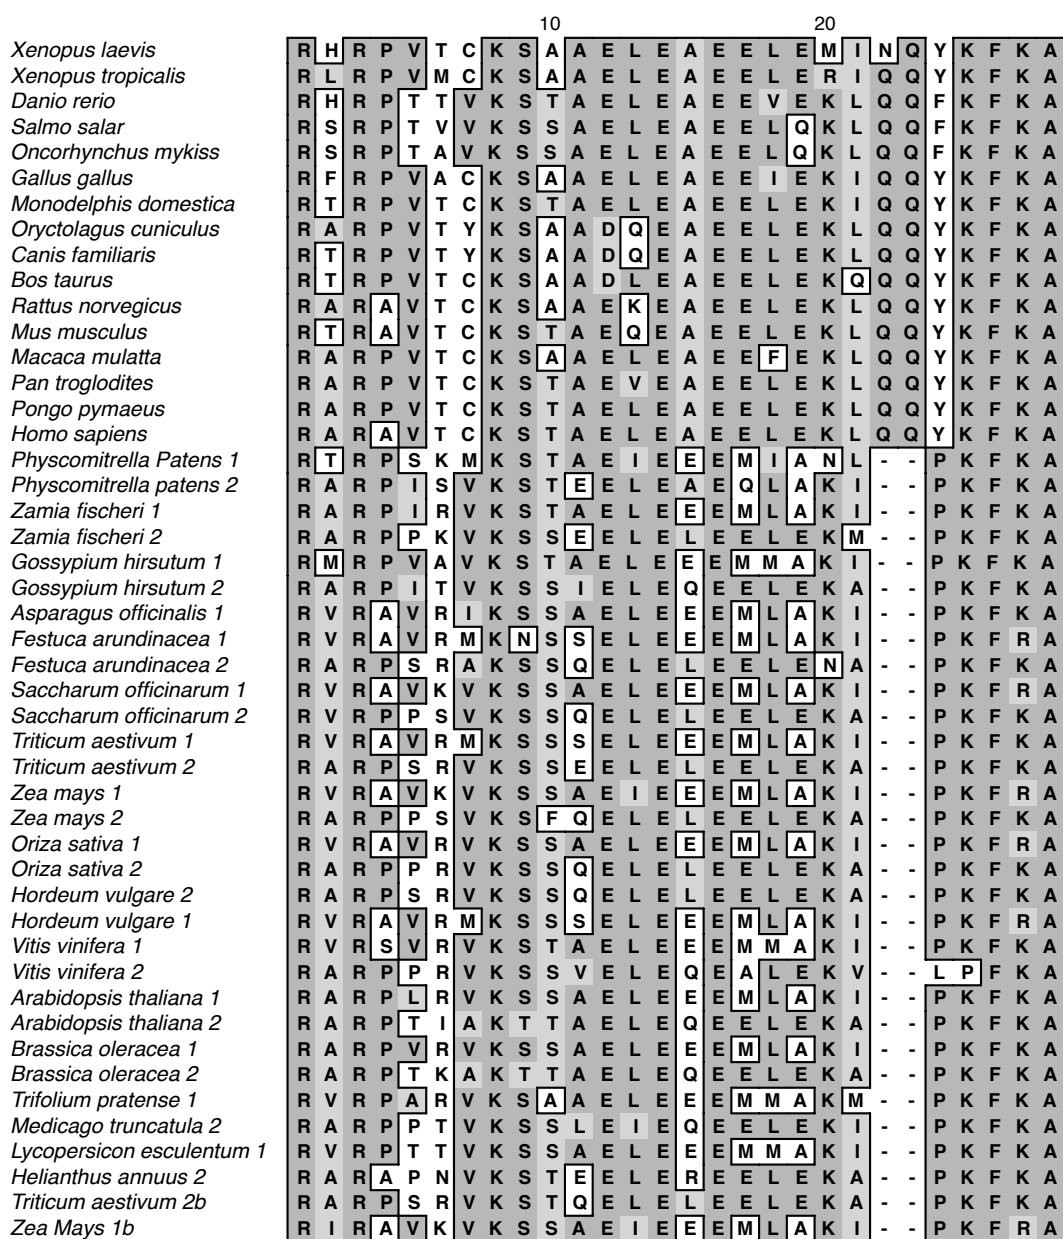

**Alignment of the TPX2 Signature Motifs.**

Blast searches identified TPX2 motifs in the protein of various animals and plants, but not in insects, worms or fungi. All researched species that were used to make a relationship tree in Supplemental Figure 2 are shown.

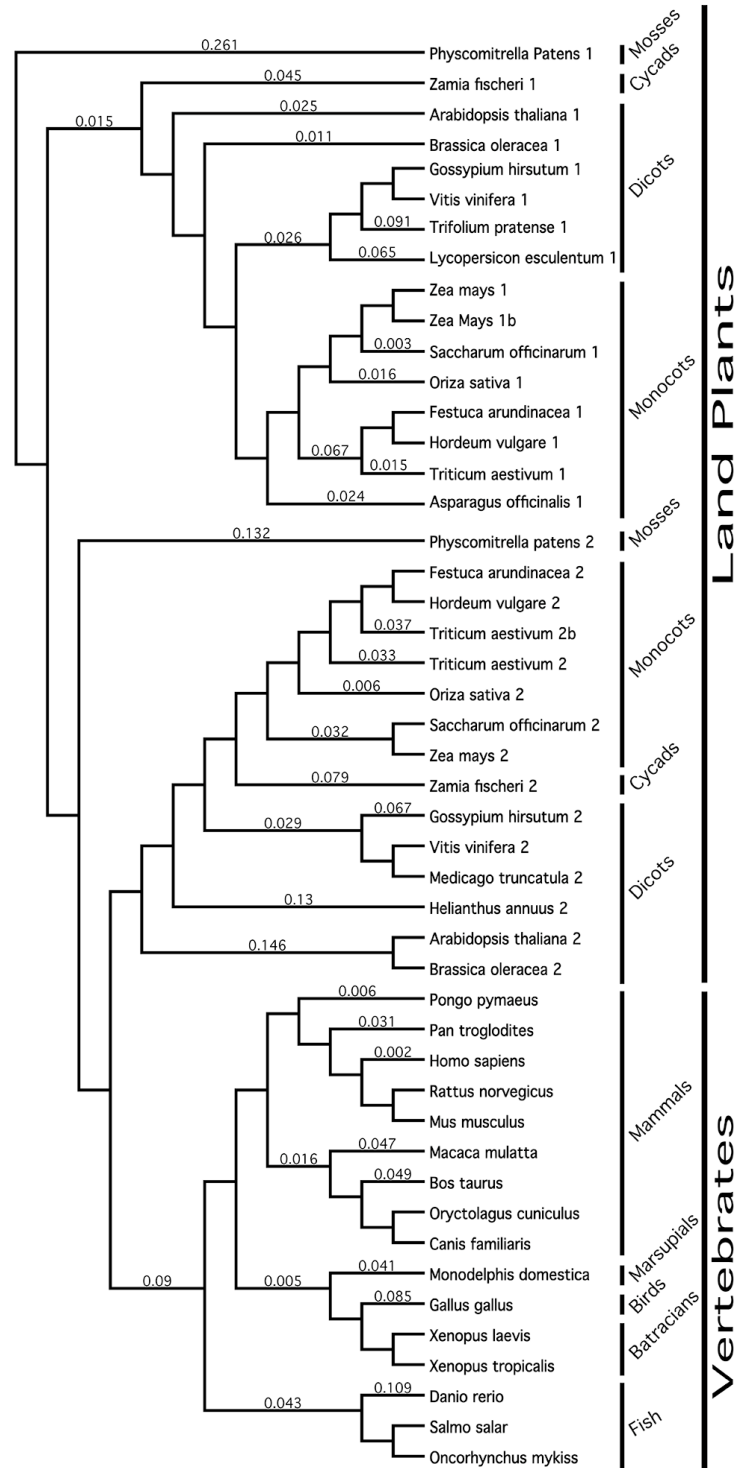

**Phylogram of Eukaryote TPX2 Signatures.**

The relationship tree was constructed on both At TPX2 signature sequences using the Neighbor Joining method and Poisson distance correction. All land plants, including the moss Physcomitrella, possess two copies of the TPX2 signature, suggesting that the duplication occurred before land plant speciation. The TPX2 signature found in vertebrates is more closely related to the second plant signature than to the first one. Interestingly, evolution is quite well respected despite the short length of the signature. Number 1 and 2 refer to the signature positions from N- to C-terminus of TPX2 found in plant species.

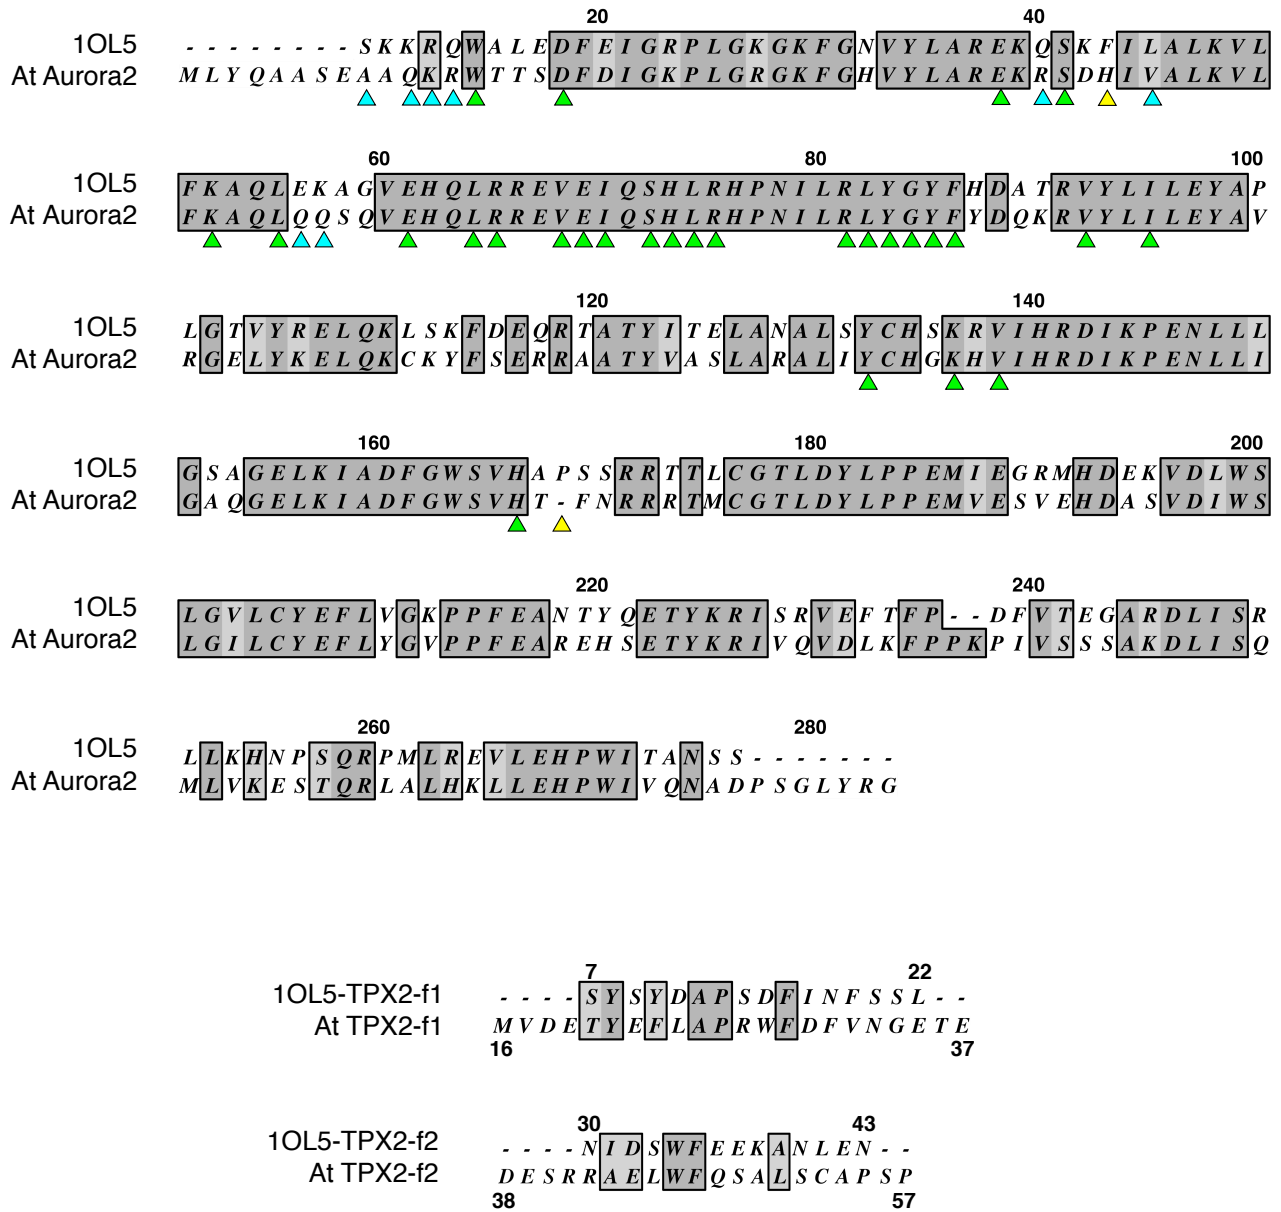

### Sequence Alignment of Arabidopsis and Human Aurora and TPX2.

Shown are the amino acid sequence alignment of At Aurora2 with the crystallographic partial sequence of Hs Aurora A (1OL5; top) and the alignment of At TPX2 with the two crystallographic sequences of Hs TPX2 that interact with HsAurora A in the crystal (bottom). The 38 amino acids from human Aurora A indicated by triangles (▲, colored according to Fig. 2A) are involved in the interaction with Hs TPX2 and show a variation of their accessible surface when calculated with or without the presence of TPX2. The full length At Aurora2 sequence, which may have conserved this function, shows 74% identity and 95% similarity to the human Aurora A sequence.

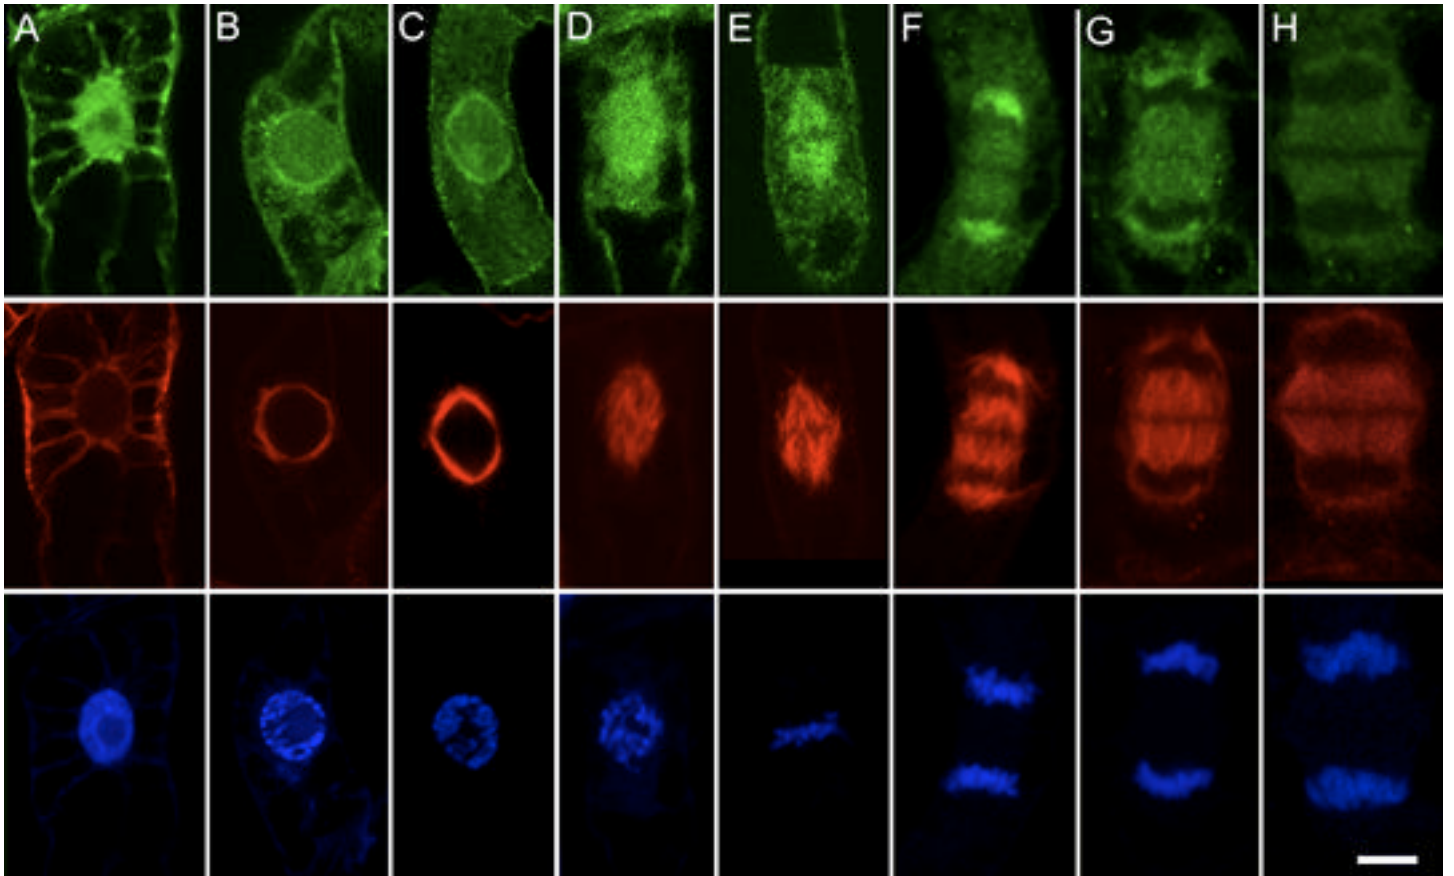

**At TPX2 Localization during Cell Division in Immunolabeled BY-2 cells.**

(A-H). Endogenous TPX2 (Top), microtubule (middle) and dapi (bottom) staining of cycling cells. TPX2 localization is intranuclear in late G2 (A) and perinuclear in early prophase (B). In late prophase (C) it forms two polar crescents outside of the nucleus. After NEB the spindle becomes labeled (D, E). The polar labeling progressively disappears during anaphase-telophase transition (F-H).

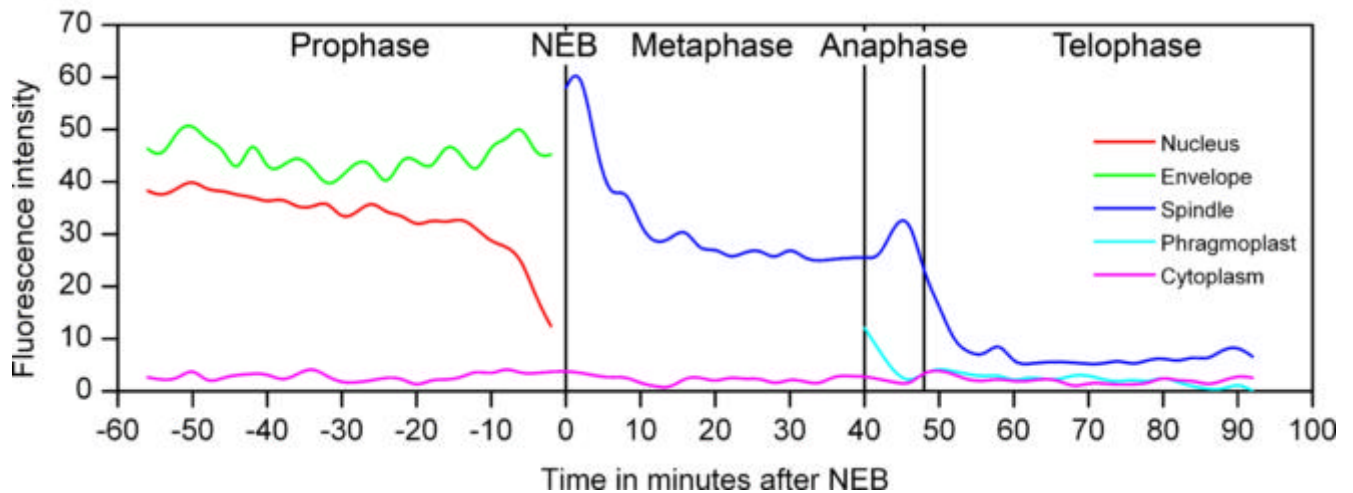

### Dynamics of At TPX2 during Cell Division.

GFP-At TPX2 fluorescence intensity graph of various BY-2 cell parts during prophase, mitosis and cytokinesis. The nuclear fluorescence is quickly reduced before NEB. The peak at the onset of metaphase is due to the intense labeling of the first microtubule bundles in the plain of focus (see also Figure 3 K at T=3'). Thereafter, the protein becomes distributed over many newly polymerized microtubules. At the end of anaphase the protein is focused to the shortening kinetochore fibers and is then clearly degraded. All fluorescence intensities were measured as the mean pixel intensities in 50 x 50 pixel boxes of the cell in movie S3, except the nuclear envelope measurements, which were based on a 15 x 15 pixel box. All data were corrected to the background intensity.

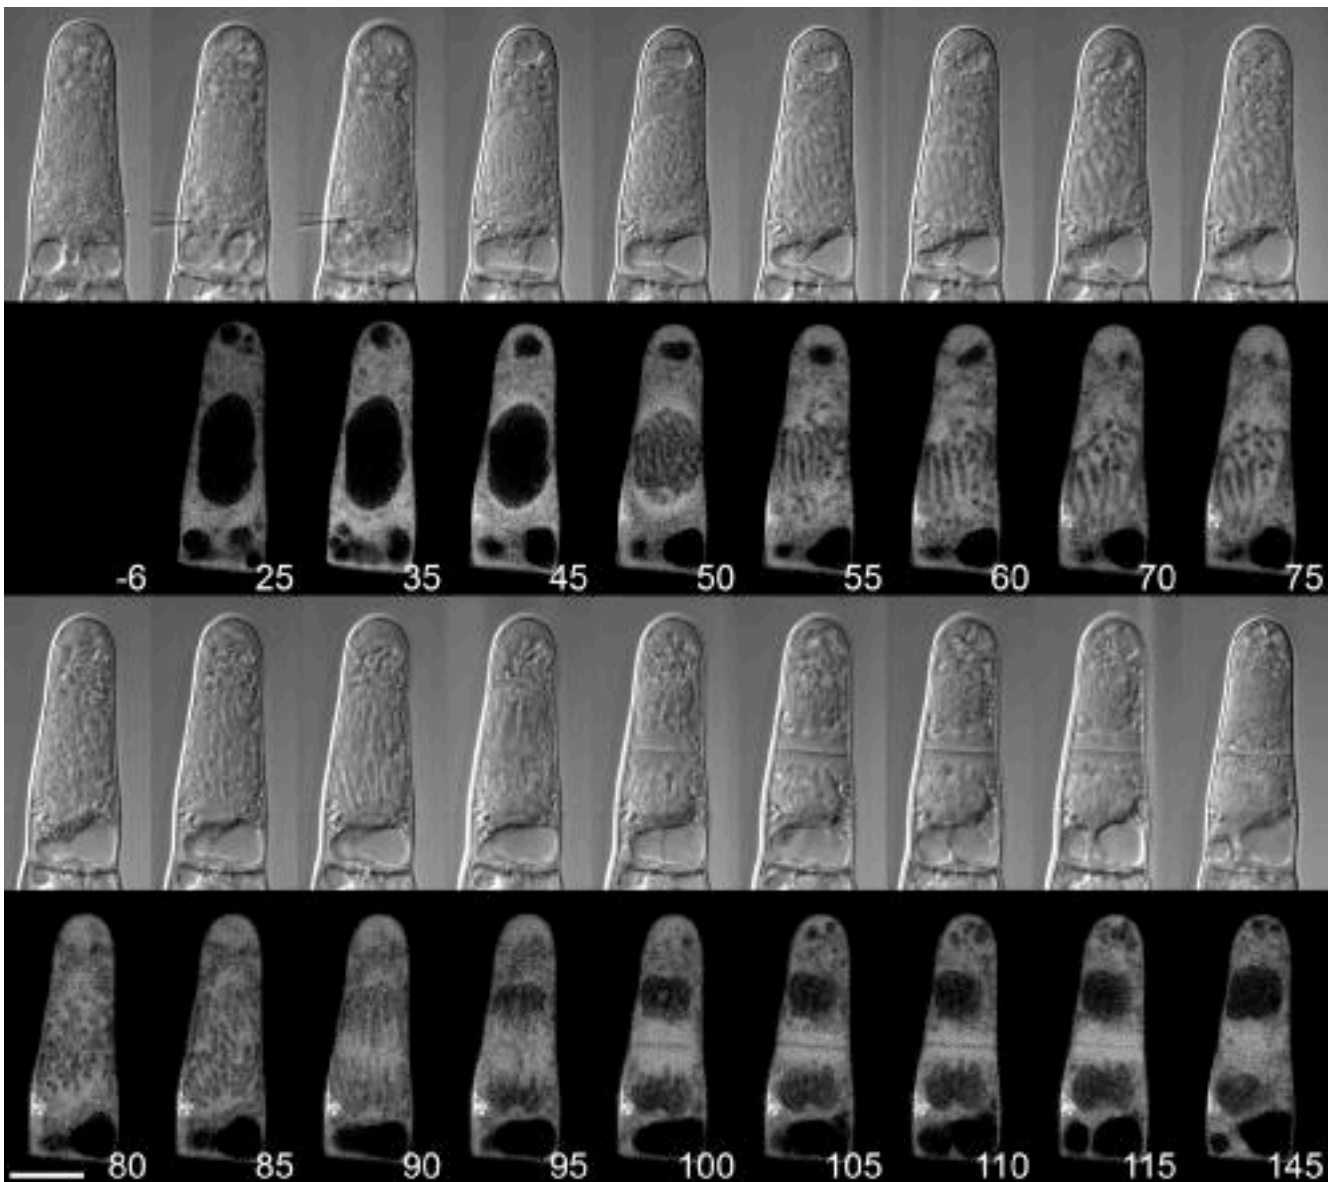

### Microinjection of TRITC-dextran.

As a control, TRITC conjugated dextran (160 kDa) was microinjected in a *Tradescantia virginiana* stamen hair cell during late prophase. The inert polysaccharide distributes throughout the cytoplasmic volume of the cell, but is excluded from the nucleus and the vacuole. Just before NEB (35 to 45 min after injection) a fluorescent halo becomes visible around the nucleus. This coincides with the (organelles excluding) pro-spindle that is formed at that time. The dextran is again excluded from the reforming nucleus during telophase due to the restricted accessible volume between the decondensing chromosomes. Needle concentration was 0.5 mg/ml, time in minutes after injection and the bar is 20  $\mu\text{m}$ .

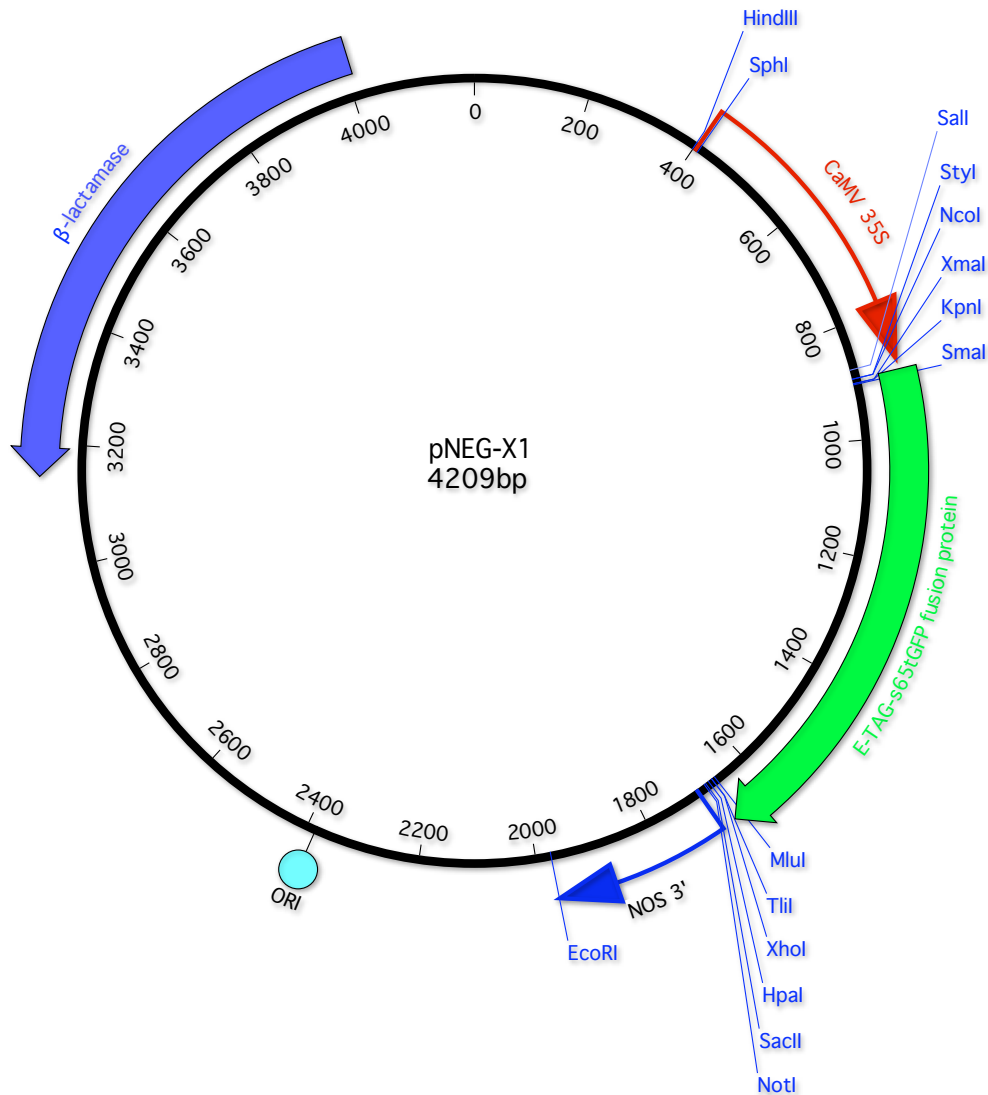

Multiple cloning site 5' end of eGFP

```

Sali      NcoI  KpnI  XmaI
ACAAATTACGTCGACTCTAGAGGATCC ATG GTA CCC GGG GCT CCA GTG CCT TAT CCA GAT CCA CTT GAA CCT CGC ATG GTG AGC
TGTTAATGTCAGCTGAGATCTCCTAGG TAC CAT GGG CCC CGA GGT CAC GGA ATA GGT CTA GGT GAA CTT GGA GCG TAC CAC TCG
M V P G A P V P Y P D P L E P R M V S
E-Tag eGFP
    
```

Multiple cloning site 3' end of eGFP

```

MluI  XhoI  HpaI  SacII  NotI
GCC GCC GGG ATC ACT CAC GGC ATG GAC GAG CTG TAC AAA CGC GTC TCG AGT TAA CCGCGGGCGGCCGCCGGCTGCAGATC
CGG CGG CCC TAG TGA GTG CCG TAC CTG CTC GAC ATG TTT GCG CAG AGC TCA ATT GGCGCCGCCGGCGGCCGACGTCTAG
A A G I T H G M D E L Y K R V S S *
eGFP
    
```

**Map and multiple cloning sites of pNEG-X1.**

Map of the pUC derivative pNEG-X1 showing the position of AmpR resistance gene, ORI, CaMV 35S promoter, E-tag-eGFP coding frame, NOS terminator as well as localization of important single cutter restriction enzymes. 5' and 3' MCS sequences are detailed below the map showing also the peptide sequence of the E-tag and translation frame.

**Combined Results of Experiments Concerning GFP:At TPX2 Expression.**

| GFP-constructs                   | Protein size in kDa | At TPX2 expression / labeling |                       |                  |                                         | Organism                      | Number of cells | Illustrations |
|----------------------------------|---------------------|-------------------------------|-----------------------|------------------|-----------------------------------------|-------------------------------|-----------------|---------------|
|                                  |                     | Nuclear only                  | Nuclear + Cytoplasmic | Nuclear excluded | Microtubule (interphase and/or mitosis) |                               |                 |               |
| full length 1-758                | 113                 | 60%                           | 5%                    | 35%              | yes                                     | Arabidopsis root meristem     | 300             | Fig 3J        |
| 1-758                            | 113                 | -                             | 4%                    | 96%              | yes                                     | <i>N. plumba.</i> protoplasts | 25              | -             |
| 1-758                            | 113                 | -                             | 100%                  | -                | yes                                     | <i>N.bentha.</i> leaves       | 300             | -             |
| 1-758                            | 113                 | 80%                           | 20%                   | -                | yes                                     | BY-2 cells                    | 80              | Fig 3K        |
| 1-758 + colchicin 10 $\mu$ M     | 113                 | 98%                           | 2%                    | -                | no                                      | BY-2 cells                    | 50              | -             |
| 1-758 + oryzalin 2 $\mu$ M       | 113                 | 96%                           | 4%                    | -                | no                                      | BY-2 cells                    | 25              | -             |
| 1-758 + latrunculin B 10 $\mu$ M | 113                 | 82%                           | 18%                   | -                | yes                                     | BY-2 cells                    | 50              | -             |
| 1-579                            | 92                  | -                             | 100%                  | -                | yes                                     | BY-2 cells                    | 72              | Fig 4B        |
| 1-463                            | 79                  | 90%                           | 10%                   | -                | no                                      | BY-2 cells                    | 62              | Fig 4A        |
| 1-303                            | 61                  | 80%                           | 20%                   | -                | no                                      | BY-2 cells                    | 64              | Fig 4A        |
| 1-104                            | 39                  | -                             | 100%                  | -                | no                                      | BY-2 cells                    | 30              | Fig 4C        |
| 1-403 + 463-758                  | 106                 | 87%                           | 13%                   | -                | yes                                     | BY-2 cells                    | 46              | Fig 4A        |
| 1-303 + 463-758                  | 95                  | 70%                           | 30%                   | -                | yes                                     | BY-2 cells                    | 34              | Fig 4A        |
| 163-463                          | 61                  | 80%                           | 20%                   | -                | no                                      | BY-2 cells                    | 60              | Fig 4A        |
| 220-463                          | 55                  | 100%                          | -                     | -                | no                                      | BY-2 cells                    | 18              | Fig 4A        |
| 220-463 NLS1 mut                 | 55                  | -                             | 100%                  | -                | yes                                     | BY-2 cells                    | 22              | Fig 4B        |
| 303-463                          | 45                  | -                             | 100%                  | -                | no                                      | BY-2 cells                    | 50              | Fig 4C        |
| ChS/1-72                         | 79                  | 11%                           | 34%                   | 55%              | no                                      | BY-2 cells                    | 18              | Fig 4D        |
| ChS/59-72                        | 72                  | -                             | 16%                   | 84%              | no                                      | BY-2 cells                    | 38              | Fig 4D        |
| ChS/220-303                      | 80                  | 100%                          | -                     | -                | no                                      | BY-2 cells                    | 22              | Fig 4A        |
| 463-758                          | 62                  | 100%                          | -                     | -                | no                                      | BY-2 cells                    | 32              | Fig 4A        |
| 220-303 + 463-758                | 72                  | 100%                          | -                     | -                | no                                      | BY-2 cells                    | 25              | Fig 4A        |
| 610-758                          | 44                  | 100%                          | -                     | -                | no                                      | BY-2 cells                    | 18              | Fig 4A        |
| 610-758 NLS2 mut                 | 44                  | -                             | -                     | 100%             | yes                                     | BY-2 cells                    | 30              | Fig 4B        |
| 303-610                          | 63                  | -                             | -                     | 100%             | yes                                     | BY-2 cells                    | 25              | Fig 4D        |
| 303-610 + LMB                    | 63                  | -                             | 100%                  | -                | no                                      | BY-2 cells                    | 25              | -             |
| 463-610                          | 44,5                | -                             | -                     | 100 %            | yes                                     | BY-2 cells                    | 25              | Fig 4D        |
| 463-610 NES mut                  | 44,5                | -                             | 100%                  | -                | no                                      | BY-2 cells                    | 21              | Fig 4C        |
| 463-610 + LMB                    | 44,5                | -                             | 100%                  | -                | no                                      | BY-2 cells                    | 25              | Fig 5B        |
| 550-630                          | 37                  | -                             | 100%                  | -                | no                                      | BY-2 cells                    | 18              | Fig 4C        |
| 684-758                          | 21                  | -                             | -                     | -                | yes                                     | BY-2 cells                    | 11              | Fig 4B        |



**SUPPLEMENTAL TABLE 2 ONLINE**

**Accession numbers**

| <b>Animal organism</b>       | <b>Accession number</b>    | <b>Plant organism</b>          | <b>Accession number</b>                       |
|------------------------------|----------------------------|--------------------------------|-----------------------------------------------|
| <i>Bos Taurus</i>            | NP_001092368 (2)           | <i>Arabidopsis thaliana</i>    | AT1G03780 (1,2)                               |
| <i>Canis familiaris</i>      | XP_850934 (2)              | <i>Asparagus officinalis</i>   | CV461179 (1)                                  |
| <i>Danio rerio</i>           | BX927210.9 (2)             | <i>Brassica oleracea</i>       | DY025756 (1,2)                                |
| <i>Gallus gallus</i>         | NP_989768 (2)              | <i>Festuca arundinacea</i>     | DT685973 (1,2)                                |
| <i>Homo sapiens</i>          | BAG50902 (2)               | <i>Gossypium hirsutum</i>      | ES817692 (1)<br>DR462351 (2)                  |
| <i>Macaca mulatta</i>        | XP_001109645 (2)           | <i>Helianthus annuus</i>       | BU028081 (2)                                  |
| <i>Monodelphis domestica</i> | XP_001364540 (2)           | <i>Hordeum vulgare</i>         | CK123033 (1,2)                                |
| <i>Mus musculus</i>          | EDL05995 (2)               | <i>Medicago truncatula</i>     | BQ147900 (2)                                  |
| <i>Oryctolagus cuniculus</i> | ENSOCUP000000<br>02784 (2) | <i>Lycopersicon esculentum</i> | BE462309 (1)                                  |
| <i>Oncorhynchus mykiss</i>   | BX085216.3 (2)             | <i>Oryza sativa</i>            | CK070246 (1,2)                                |
| <i>Pan troglodites</i>       | XP_514566 (2)              | <i>Physcomitrella Patens</i>   | XP_001755041<br>(1,2)                         |
| <i>Pongo pymaeus</i>         | NP_001125744 (2)           | <i>Saccharum officinarum</i>   | CA249551 (1)<br>CA293532 (2)                  |
| <i>Rattus norvegicus</i>     | NP_001101260 (2)           | <i>Trifolium pratense</i>      | BB912562 (1)                                  |
| <i>Salmo salar</i>           | DY736807.1 (2)             | <i>Triticum aestivum</i>       | CD924467 (2)<br>BE637442 (2b)                 |
| <i>Xenopus tropicalis</i>    | AAI35343 (2)               | <i>Vitis vinifera</i>          | CAO69775 (1,2)                                |
| <i>Xenopus laevis</i>        | AAH68637 (2)               | <i>Zamia fischeri</i>          | DY030926 (1,2)                                |
|                              |                            | <i>Zea mays</i>                | BQ487079 (1)<br>CF015305 (1b)<br>CF036158 (2) |
|                              |                            | <i>Oryza sativa</i>            | CK070246 (1,2)                                |
|                              |                            | <i>Physcomitrella Patens</i>   | XP_001755041<br>(1,2)                         |

Accession numbers corresponding to various organism sequences in which a TPX2 signature is present. (1) and (2) refers to the closest similarity to respectively the first and second signature motif found in *Arabidopsis thaliana*. (1,2) refers to sequences including both signatures.

**SUPPLEMENTAL TABLE 3 ONLINE**

**List of primers used in generating various At TPX2 constructs**

| <b>GFP-constructs</b> | <b>Oligos used for GFP fusions</b>           |                                  |
|-----------------------|----------------------------------------------|----------------------------------|
| <b>in pNEGX1</b>      | <b>forward</b>                               | <b>reverse</b>                   |
| 1-758                 | GTCTCGAGTATGGAAGCAACGGCGGAG                  | GCGGCCGC TTATCTCATCTGACCAGC      |
| 463-758               | GTCTCGAGTGAAAGTAAAGGAGAAATG                  | GCGGCCGC TTATCTCATCTGACCAGC      |
| 1-579                 | GTCTCGAGTATGGAAGCAACGGCGGAG                  | GCGGCCGC AGGTTCTGTTTTGGTGG       |
| 1-463                 | GTCTCGAGTATGGAAGCAACGGCGGAG                  | GCGGCCGC AAATATCTTTTTGTTCAA      |
| 1-303                 | GTCTCGAGTATGGAAGCAACGGCGGAG                  | GCGGCCGC GCTTGTGGAACTTCTT        |
| 1-104                 | GTCTCGAGTATGGAAGCAACGGCGGAG                  | GCGGCCGC AGAAGGCTGCGATTGTAA      |
| 1-403                 | GTCTCGAGTATGGAAGCAACGGCGGAG                  | GCGGCCGC TGAAGCTATTGAAGATGT      |
| 163-463               | GTCTCGAGTCCCAAACCACCAATGCAG                  | GCGGCCGC AAATATCTTTTTGTTCAA      |
| 220-463               | GTCTCGAGTACTACCAATCTGATTCAA                  | GCGGCCGC AAATATCTTTTTGTTCAA      |
| 220-463 NLS1 mut      | GTCTCGAGTACTACCAATCTGATTCAA                  | GCGGCCGC AAATATCTTTTTGTTCAA      |
| 303-463               | GTCTCGAGTAGCACGCGAGACCTATTC                  | GCGGCCGC AAATATCTTTTTGTTCAA      |
| 463-758               | GTCTCGAGTTTTGAAAGTAAAGGAGAA                  | GCGGCCGC TTATCTCATCTGACCAGC      |
| 220-303               | GTCTCGAGTACTACCAATCTGATTCAA                  | GCGGCCGC GCTTGTGGAACTTCTT        |
| 610-758               | GTCTCGAGTATGGAGACAGAAGAAGCC                  | GCGGCCGC TTATCTCATCTGACCAGC      |
| 610-758 NLS2 mut      | GTCTCGAGTATGGAGACAGAAGAAGCC                  | GCGGCCGC TTATCTCATCTGACCAGC      |
| 303-610               | GTCTCGAGTAGCACGCGAGACCTATTC                  | GCGGCCGC TCTCCTCCTCTTCCCT        |
| 463-610               | CACGCGTGT TTTGAAAGTAAAGGAGAA                 | GCGGCCGC TCTCCTCCTCTTCCCT        |
| 463-610 NES mut       | CACGCGTGT TTTGAAAGTAAAGGAGAA                 | GCGGCCGC TCTCCTCCTCTTCCCT        |
| 550-630               | GTCTCGAGTAAATTAGGAGATGTAAAG                  | GCGGCCGC TGGTCTCTTTTATAAC        |
| 684-758               | GTCTCGAGTATGGTGGAGGAAGAGAGA                  | GCGGCCGC TTATCTCATCTGACCAGC      |
| <b>in pKC-GFP-CHS</b> |                                              |                                  |
|                       |                                              |                                  |
| ChS/1-72              | CACGCGTGGGGCGGAGGGGGATGGAAG-<br>-CAACGGCGGAG | TCTAGATTATTAGGCCTCTACCTTGAACGA   |
| ChS/59-72             | CACGCGTGGGGCGGAGGGGGCCTAGAAT-<br>-CAAAGCAAGG | TCTAGATTATTAGGCCTCTACCTTGAACGA   |
| ChS/220-303           | CACGCGTGGGGCGGAGGGGGTCAAGCCA-<br>-TCAAAAGGC  | TCTAGATTATTACAGTGTGAGCTTAGGTGG   |
|                       |                                              |                                  |
| <b>GFP-constructs</b> | <b>Oligos used for Mutagenesis</b>           |                                  |
| <b>in pNEGX1</b>      | <b>forward</b>                               | <b>reverse</b>                   |
| 220-463 NLS1 mut      | CAAGCCATCAAttGGCAAAAGCTAG                    | CTAGCTTTTGCcAaTTGATGGCTTG        |
| 610-758 NLS2 mut      | GAACCAGTACAAtgGATACCGTGAAG                   | CTTCACGGTATCcaTTGTAAGTGGTTC      |
| 463-610 NES mut       | CTGTCTTtGATATATTTCGACAAGtTCTCACTG            | CAGTGAGAAcTTGTGCAATATATCaAAGACAG |

Restriction sites corresponding to XhoI (red), NotI (blue), MuiI (pink) and XbaI (green) are shown upstream of the TPX2 coding sequence. Lower case letters correspond to mutagenized bases.
